# Supplementary material for: Bifunctional Opioid/Melanocortin Peptidomimetics for Use in Neuropathic Pain: Variation in the Type and Length of the Linker Connecting the Two Pharmacophores
Source: MDPI journal article supplement (doi:10.3390/ijms23020674), 2022-01-08
Supplement: s1 [file s1]

**Bifunctional opioid / melanocortin peptidomimetics for use in neuropathic pain: variation in the type and length of the linker connecting the two pharmacophores**

Ewa Witkowska <sup>1,\*</sup>, Magda Godlewska <sup>1</sup>, Jowita Osiejuk <sup>1</sup>, Sandra Gątarz <sup>1</sup>, Beata Wileńska <sup>1,2</sup>, Katarzyna Kosińska <sup>1</sup>, Joanna Starnowska-Sokół <sup>3</sup>, Anna Piotrowska <sup>3</sup>, Piotr F. J. Lipiński <sup>4</sup>, Joanna Matalińska <sup>4</sup>, Jolanta Dyniewicz <sup>4</sup>, Paweł K. Halik <sup>5</sup>, Ewa Gniazdowska <sup>5</sup>, Barbara Przewlocka <sup>3</sup> and Aleksandra Misicka <sup>1,2,\*</sup>

<sup>1</sup> Faculty of Chemistry, University of Warsaw, Pasteura 1, 02-093 Warsaw, Poland; magda.god@onet.pl (M.G.); jowita.osiejuk@student.uw.edu.pl (J.O.); sandra.gatarz@student.uw.edu.pl (S.G.); bwilenska@chem.uw.edu.pl (B.W.); katarzyna.kosinska2@student.uw.edu.pl (K.K.)

<sup>2</sup> Biological and Chemical Research Centre, University of Warsaw, 101 Zwirki i Wigury St., 02-097 Warsaw, Poland

<sup>3</sup> Department of Pain Pharmacology, Maj Institute of Pharmacology, Polish Academy of Sciences, 12 Smetna Str., 31-343 Krakow, Poland; joanna.starnowska@gmail.com (J.S.-S.); anna.piotrowskamurzyn@gmail.com (A.P.); barbara.przewlocka@gmail.com (B.P.)

<sup>4</sup> Department of Neuropeptides, Mossakowski Medical Research Institute Polish Academy of Sciences, Pawińskiego 5, 02-106 Warsaw, Poland; plipinski@imdik.pan.pl (P.F.J.L.); jmatalinska@imdik.pan.pl (J.M.); jdyniewicz@imdik.pan.pl (J.D.)

<sup>5</sup> Centre of Radiochemistry and Nuclear Chemistry, Institute of Nuclear Chemistry and Technology, Dorodna 16, 03-195 Warsaw, Poland; p.halik@ichtj.waw.pl (P.K.H.); e.gniazdowska@ichtj.waw.pl (E.G.)

\* Correspondence: ewawit@chem.uw.edu.pl (E.W.); misicka@chem.uw.edu.pl (A.M.)

**Table of contents**

|                                                                                                                                       |       |
|---------------------------------------------------------------------------------------------------------------------------------------|-------|
| <b>Figure S1.</b> General scheme for the synthesis of peptidomimetics 1-8 .....                                                       | SI-2  |
| <b>Analytical and spectroscopic methods</b> .....                                                                                     | SI-3  |
| <b>Table S1.</b> Analytical data of synthesized peptidomimetics 1-9 .....                                                             | SI-3  |
| <b>Chromatograms and mass spectra of purified compounds 1-9</b> .....                                                                 | SI-4  |
| <b>Figure S2.</b> Chromatogram and mass spectra of purified compound 1 .....                                                          | SI-4  |
| <b>Figure S3.</b> Chromatogram and mass spectra of purified compound 2 .....                                                          | SI-4  |
| <b>Figure S4.</b> Chromatogram and mass spectra of purified compound 3 .....                                                          | SI-4  |
| <b>Figure S5.</b> Chromatogram and mass spectra of purified compound 4 .....                                                          | SI-5  |
| <b>Figure S6.</b> Chromatogram and mass spectra of purified compound 5 .....                                                          | SI-5  |
| <b>Figure S7.</b> Chromatogram and mass spectra of purified compound 6 .....                                                          | SI-5  |
| <b>Figure S8.</b> Chromatogram and mass spectra of purified compound 7 .....                                                          | SI-6  |
| <b>Figure S9.</b> Chromatogram and mass spectra of purified compound 8 .....                                                          | SI-6  |
| <b>Figure S10.</b> Chromatogram and mass spectra of purified compound 9 .....                                                         | SI-6  |
| <b>Table S2.</b> Lipophilicity of compounds 1-4 .....                                                                                 | SI-7  |
| <b>Docking of compounds 1-4 to MOR.</b>                                                                                               |       |
| <b>Table S3.</b> Energetics of the top scored clusters (at MOR). . . . .                                                              | SI-8  |
| <b>Figure S11.</b> Binding poses of compounds 1-4 and DAMGO in the MOR binding site. Focus on the opioid fragment. ....               | SI-8  |
| <b>Figure S12.</b> Binding poses of compounds 1-4 in the MOR binding site. Focus on the melanocortin-pharmacophoric fragment. ....    | SI-9  |
| <b>Contacts of the melanocortin-pharmacophoric fragment of compounds 1-4 with MOR</b> .....                                           | SI-9  |
| <b>Docking of compounds 1-4 to DOR.</b>                                                                                               |       |
| <b>Table S4.</b> Energetics of the top scored clusters (at DOR). . . . .                                                              | SI-10 |
| <b>Figure S13.</b> Binding poses of compounds 1-4 in the DOR binding site. Focus on the opioid fragment. .                            | SI-10 |
| <b>Figure S14.</b> Binding poses of compounds 1-4 in the DOR binding site. Focus on the melanocortin-pharmacophoric fragment. . . . . | SI-11 |
| <b>Docking of compounds 1-4 to MC4R.</b>                                                                                              |       |
| <b>Table S5.</b> Energetics of the top scored clusters (at MC4R). . . . .                                                             | SI-12 |
| <b>Listing of interactions of the opioid-linker fragment found in complexes of 3 with MC4R</b> .....                                  | SI-12 |
| <b>Figure S15.</b> Binding poses of compounds 1-4 and of SHU9119 at the MC4R receptor. ....                                           | SI-12 |
| <b>Figure S16.</b> Binding poses of compounds 1-4 at the MC4R receptor (side-view). Focus on the positioning                          |       |

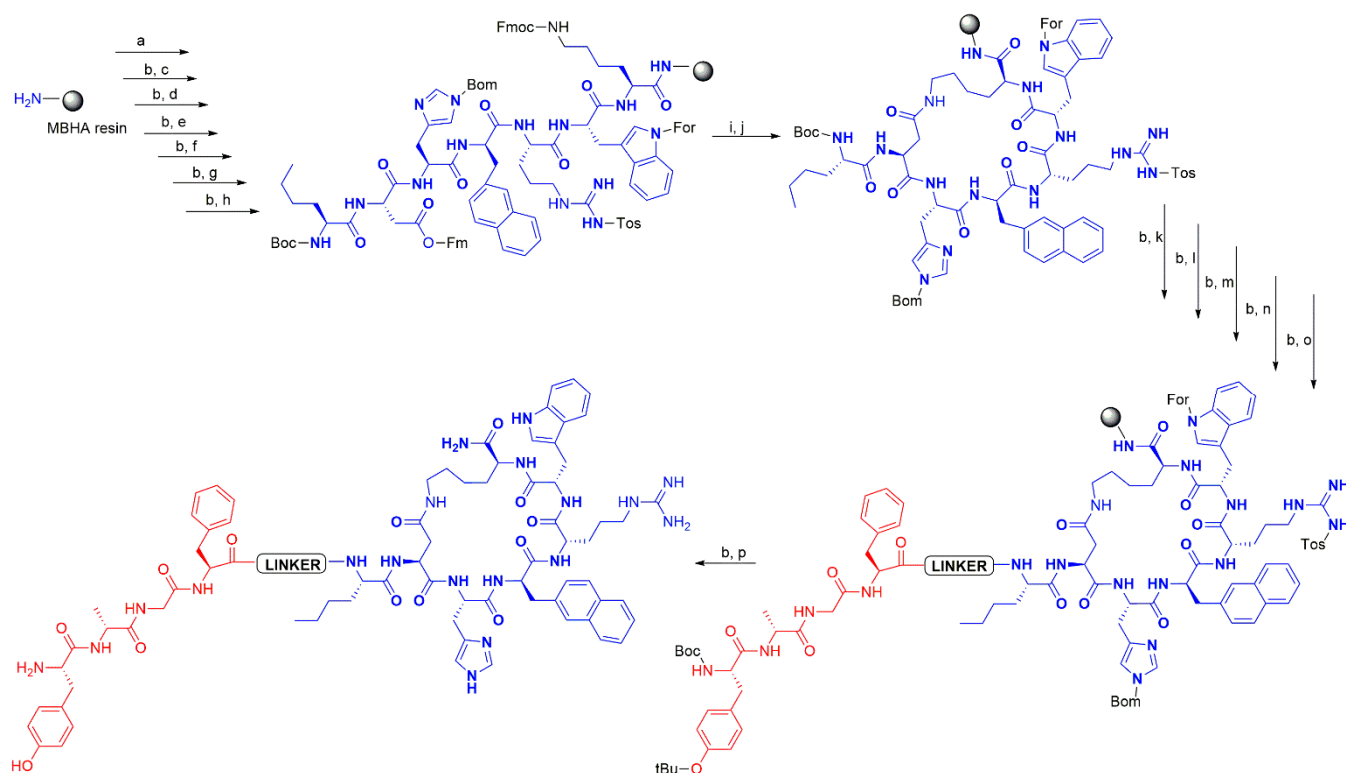

**Figure S1.** General scheme for the synthesis of peptidomimetics **1-8**: a) Boc-Lys(Fmoc)-OH, DIC, HOBT; b) 50% TFA in DCM; c) Boc-Trp(For)-OH, DIC, HOBT; d) Boc-Arg(Tos)-OH, DIC, HOBT; e) Boc-D-Nal(2')-OH, DIC, HOBT; f) Boc-His(Bom)-OH, DIC, HOBT; g) Boc-Asp(OFm)-OH, DIC, HOBT; h) Boc-Nle-OH, DIC, HOBT; i) 30% piperidine in DMF; j) DIC, HOBT; k) protected linker (Boc-D-Ala-OH or Boc-β-Ala-OH or Fmoc-Ahx-OH or Fmoc-4-AMB-OH or Fmoc-4-APhAc-OH or Boc-Gly-OH, Boc-Pro-OH), DIC, HOBT; l) Boc-Phe-OH, DIC, HOBT; m) Boc-Gly-OH, DIC, HOBT; n) Boc-D-Ala-OH, DIC, HOBT; o) Boc-Tyr(tBu)-OH, DIC, HOBT; p) HF

In the case of compound **9**, instead of tyrosine in the first position, 2,6-dimethyltyrosine (Dmt) is used.

## Analytical and spectroscopic methods

Purification and analysis of synthesized compounds **1-9** were performed on a Knauer HPLC system. The peptidomimetics were purified by semipreparative RP HPLC with column : Neukleosil 300 C18 (5 µm, 8 x 250 mm). A solvent system was used - A: 0,1% TFA in water, B: 80% MeCN in A, with flow rate 2.0 mL/min. The fractions were analyzed with the same system using a Eurospher 100 C18 reversed-phase analytical column (5 µm, 4.6 x 250 mm) and the same solvent systems (1.0 mL/min, t<sub>r</sub> = 20 min). Detection was at 220 nm. Mass spectra were registered on the Shimadzu LC-MS mass spectrometer provided with an ESI ion source (electrospray), ion trap and time-of-flight analyzer Analyses were carried out in the positive ion mode. For compound **9** MALDI Shimadzu Biotech Axima Performance with time-of-flight analyzer and the cinnamic acid as the matrix was used.

**Table S1.** Analytical data of synthesized peptidomimetics **1-9**

| Code     | Compound                                    | Molecular formula                                                | Molecular weight<br>(g/mol) | ESI MS<br>Ion [M + 3H] <sup>3+</sup> |          | HPLC <sup>a</sup><br>(t <sub>R</sub> , min) |
|----------|---------------------------------------------|------------------------------------------------------------------|-----------------------------|--------------------------------------|----------|---------------------------------------------|
|          |                                             |                                                                  |                             | m/z calcd                            | m/z obsd |                                             |
| <b>1</b> | ENK-D-Ala-SHU                               | C <sub>78</sub> H <sub>100</sub> N <sub>20</sub> O <sub>14</sub> | 1540.8                      | 514.6                                | 514.6    | 13.2 <sup>b</sup>                           |
| <b>2</b> | ENK-β-Ala-SHU                               | C <sub>78</sub> H <sub>100</sub> N <sub>20</sub> O <sub>14</sub> | 1540.8                      | 514.6                                | 514.6    | 12.1 <sup>b</sup>                           |
| <b>3</b> | ENK-Ahx-SHU                                 | C <sub>81</sub> H <sub>106</sub> N <sub>20</sub> O <sub>14</sub> | 1583.8                      | 528.6                                | 528.9    | 13.2 <sup>b</sup>                           |
| <b>4</b> | ENK-(Ahx) <sub>2</sub> -SHU                 | C <sub>87</sub> H <sub>117</sub> N <sub>21</sub> O <sub>15</sub> | 1697.0                      | 566.6                                | 566.6    | 12.3 <sup>b</sup>                           |
| <b>5</b> | ENK-4AMB-SHU                                | C <sub>83</sub> H <sub>102</sub> N <sub>20</sub> O <sub>14</sub> | 1603.8                      | 535.6                                | 535.6    | 13.2 <sup>c</sup>                           |
| <b>6</b> | ENK-4PhAc-SHU                               | C <sub>83</sub> H <sub>102</sub> N <sub>20</sub> O <sub>14</sub> | 1603.8                      | 535.6                                | 535.3    | 14.3 <sup>b</sup>                           |
| <b>7</b> | ENK-Pro-Gly-SHU                             | C <sub>82</sub> H <sub>105</sub> N <sub>21</sub> O <sub>15</sub> | 1624.8                      | 542.6                                | 542.3    | 10.7 <sup>d</sup>                           |
| <b>8</b> | ENK-(Pro-Gly) <sub>2</sub> -SHU             | C <sub>89</sub> H <sub>115</sub> N <sub>23</sub> O <sub>17</sub> | 1778.9                      | 594.0                                | 593.6    | 10.3 <sup>d</sup>                           |
| <b>9</b> | [Dmt <sup>1</sup> ]ENK-Ahx-SHU <sup>e</sup> | C <sub>83</sub> H <sub>110</sub> N <sub>20</sub> O <sub>14</sub> | 1611.8 <sup>f</sup>         |                                      |          | 10.9 <sup>d</sup>                           |

<sup>a</sup> Performed on a Knauer system (Eurospher 100- C18, 4.6 mm x 250 mm, 5 µm), time of analysis 20 min, v=1ml/min; <sup>b,c,d</sup> HPLC solvent system A 0.1% TFA in water, B 80% MeCN in A, <sup>b</sup> programme 40-70% B, <sup>c</sup> programme 30-70% B, <sup>d</sup> programme 40-80% B; <sup>e</sup> Dmt – 2,6-dimethyltyrosine; <sup>f</sup> MALDI MS analysis of **9**: calcd 1611.8 obsd 1611.4;

## Chromatograms and mass spectra of purified compounds 1-9

**1** ENK-D-Ala-SHU (Tyr-D-Ala-Gly-Phe-D-Ala-Nle-c[Asp-His-D-Nal(2')-Arg-Trp-Lys]-NH<sub>2</sub>) C<sub>78</sub>H<sub>100</sub>N<sub>20</sub>O<sub>14</sub>  
MW 1540.8 g/mol

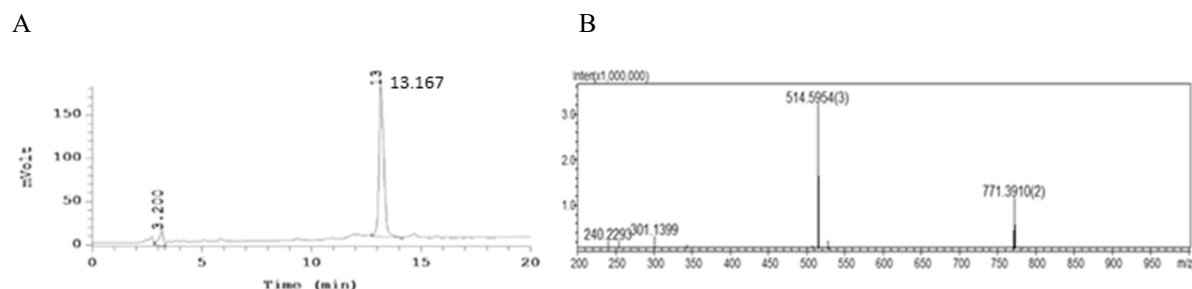

**Figure S2.** Chromatogram and mass spectra of purified compound **1** A) RP HPLC chromatogram of **1**, linear gradient 40-70% B,  $t_R$  13.2 min; B) ESI MS of **1**  $m/z$   $[M+2H]^{2+}$  calcd 771.4, obsd 771.4,  $[M+3H]^{3+}$  calcd 514.6, obsd 514.6.

**2** ENK- $\beta$ -Ala-SHU (Tyr-D-Ala-Gly-Phe- $\beta$ -Ala-Nle-c[Asp-His-D-Nal(2')-Arg-Trp-Lys]-NH<sub>2</sub>) C<sub>78</sub>H<sub>100</sub>N<sub>20</sub>O<sub>14</sub>  
MW 1540.8 g/mol

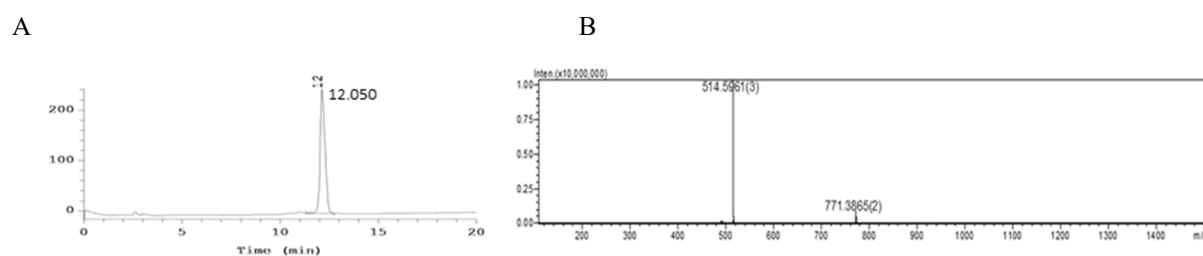

**Figure S3.** Chromatogram and mass spectra of purified compound **2** A) RP HPLC chromatogram of **2**, linear gradient 40-70% B,  $t_R$  12.1 min; B) ESI MS of **2**  $m/z$   $[M+2H]^{2+}$  calcd 771.4, obsd 771.4,  $[M+3H]^{3+}$  calcd 514.6, obsd 514.6.

**3** ENK-Ahx-SHU (Tyr-D-Ala-Gly-Phe-Ahx-Nle-c[Asp-His-D-Nal(2')-Arg-Trp-Lys]-NH<sub>2</sub>)  
C<sub>81</sub>H<sub>106</sub>N<sub>20</sub>O<sub>14</sub> MW 1583.8 g/mol

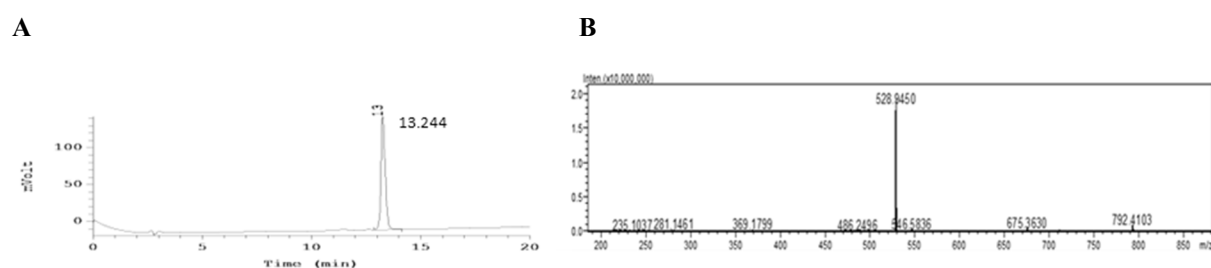

**Figure S4.** Chromatogram and mass spectra of purified compound **3** A) RP HPLC chromatogram of **3**, linear gradient 40-70% B,  $t_R$  13.2 min; B) ESI MS of **3**  $m/z$   $[M+3H]^{3+}$  calcd 528.6, obsd 528.9

**4** ENK-(Ahx)<sub>2</sub>-SHU (Tyr-D-Ala-Gly-Phe-Ahx-Ahx-Nle-c[Asp-His-D-Nal(2')-Arg-Trp-Lys]-NH<sub>2</sub>)  
 C<sub>87</sub>H<sub>117</sub>N<sub>21</sub>O<sub>15</sub> MW 1697.0 g/mol

A

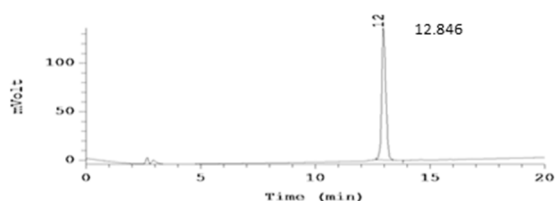

B

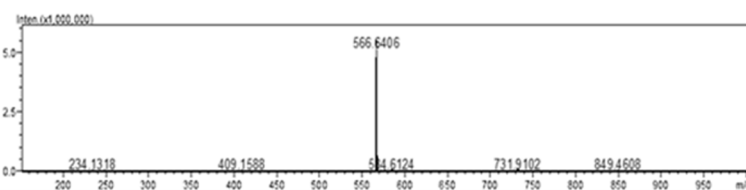

**Figure S5.** Chromatogram and mass spectra of purified compound **4** A) RP HPLC chromatogram of **4**, linear gradient 40-70% B,  $t_R$  12.8 min; B) ESI MS of **4**  $m/z$   $[M+3H]^{3+}$  calcd 566.6, obsd 566.6

**5** ENK-4AMB-SHU (Tyr-D-Ala-Gly-Phe-4AMB-Nle-c[Asp-His-D-Nal(2')-Arg-Trp-Lys]-NH<sub>2</sub>)  
 C<sub>83</sub>H<sub>102</sub>N<sub>20</sub>O<sub>14</sub> MW 1603.8 g/mol

A

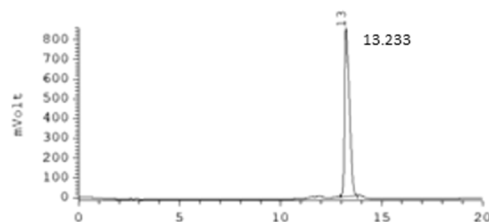

B

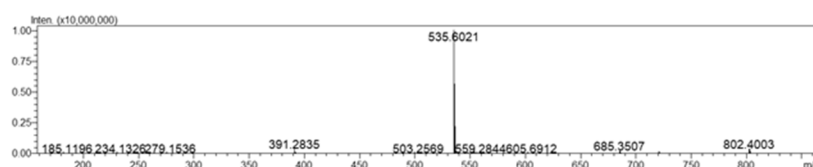

**Figure S6.** Chromatogram and mass spectra of purified compound **5** A) RP HPLC chromatogram of **5**, linear gradient 30-70% B,  $t_R$  13.2 min; B) ESI MS of **5**  $m/z$   $[M+3H]^{3+}$  calcd, 535.6, obsd 535.6

**6** ENK-4APhAc-SHU (Tyr-D-Ala-Gly-Phe-4APhAc-Nle-c[Asp-His-D-Nal(2')-Arg-Trp-Lys]-NH<sub>2</sub>)  
 C<sub>83</sub>H<sub>102</sub>N<sub>20</sub>O<sub>14</sub> MW 1603.8g/mol

A

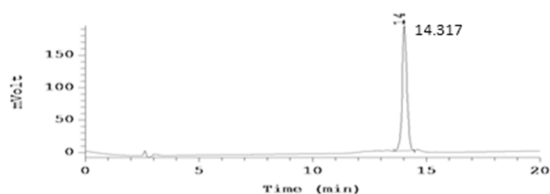

B

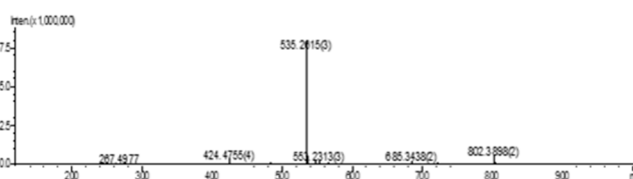

**Figure S7.** Chromatogram and mass spectra of purified compound **6** A) RP HPLC chromatogram of **6**, linear gradient 40-70% B,  $t_R$  14.3 min; B) ESI MS of **6**  $m/z$   $[M+3H]^{3+}$  calcd, 535.6, obsd 535.3

**7** ENK-Pro-Gly-SHU (Tyr-D-Ala-Gly-Phe-Pro-Gly-Nle-c[Asp-His-D-Nal(2')-Arg-Trp-Lys]-NH<sub>2</sub>)  
 $C_{82}H_{105}N_{21}O_{15}$  MW 1624.8 g/mol

A

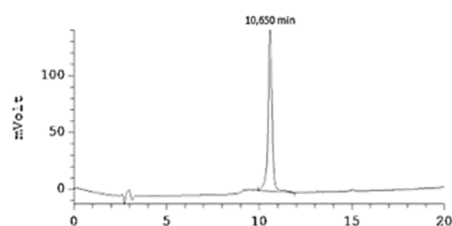

B

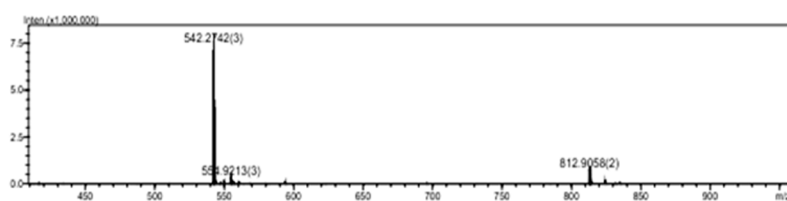

**Figure S8.** Chromatogram and mass spectra of purified compound **7** A) RP HPLC chromatogram of **7**, linear gradient 40-80% B,  $t_R$  10.7 min; B) ESI MS of **7**  $m/z$   $[M+3H]^+$  calcd 542.6, obsd 542.3

**8** ENK-(Pro-Gly)<sub>2</sub>-SHU (Tyr-D-Ala-Gly-Phe-(Pro-Gly)<sub>2</sub>-Nle-c[Asp-His-D-Nal(2')-Arg-Trp-Lys]-NH<sub>2</sub>)  
 $C_{89}H_{115}N_{23}O_{17}$  MW 1778.9 g/mol

A

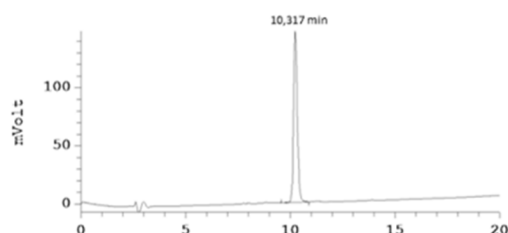

B

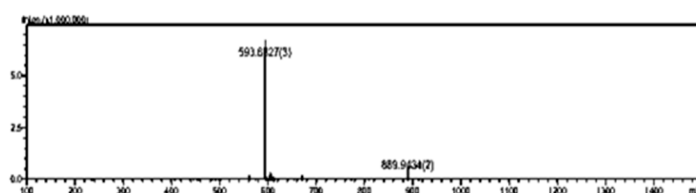

**Figure S9.** Chromatogram and mass spectra of purified compound **8** A) RP HPLC chromatogram of **8**, linear gradient 40-80% B,  $t_R$  10.3 min; B) ESI MS of **8**  $m/z$   $[M+3H]^+$  calcd 594.0, obsd 593.6

**9** [Dmt<sup>1</sup>]ENK-Ahx-SHU (Dmt-D-Ala-Gly-Phe-Ahx-Nle-c[Asp-His-D-Nal(2')-Arg-Trp-Lys]-NH<sub>2</sub>)  
 $C_{83}H_{110}N_{20}O_{14}$  MW 1611.8g/mol

A

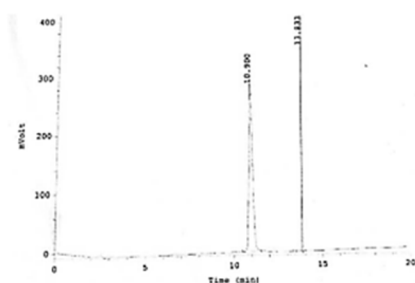

B

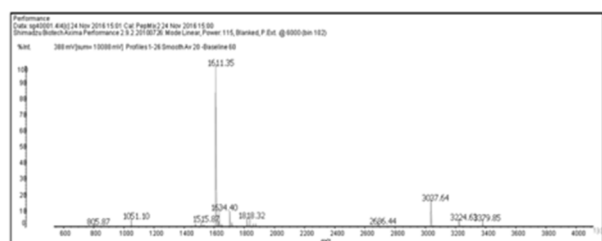

**Figure S10.** Chromatogram and mass spectra of purified compound **9** A) RP HPLC chromatogram of **9**, linear gradient 40-80% B,  $t_R$  10.9 min; B) MALDI MS of **9** calcd 1611.8, obsd 1611.4

**Table S2.** Lipophilicity of compounds **1-4**.

| Code | Compound              | Lipophilicity                    |                  |
|------|-----------------------|----------------------------------|------------------|
|      |                       | P                                | Log P            |
| 1    | ENK-Ala-SHU           | $(5.01 \pm 0.26) \times 10^{-3}$ | $-2.30 \pm 0.02$ |
| 2    | ENK- $\beta$ -Ala-SHU | $(4.66 \pm 0.22) \times 10^{-3}$ | $-2.33 \pm 0.02$ |
| 3    | ENK-Ahx-SHU           | $(3.75 \pm 0.12) \times 10^{-3}$ | $-2.43 \pm 0.01$ |
| 4    | ENK-Ahx-Ahx-SHU       | $(1.21 \pm 0.05) \times 10^{-3}$ | $-2.92 \pm 0.02$ |

# **Docking of compounds 1-4 to MOR.**

**Table S3.** Energetics of the top scored clusters (at MOR).

|           |         | Lowest binding energy | Mean binding energy | Number in cluster |
|-----------|---------|-----------------------|---------------------|-------------------|
| Compounds | Cluster | [kcal/mol]            |                     |                   |
| 1         | A       | -8.11                 | -7.05               | 21                |
|           | B       | -8.06                 | -7.18               | 299               |
| 2         |         | -9.37                 | -8.40               | 56                |
| 3         | A       | -9.97                 | -8.59               | 11                |
|           | B       | -9.96                 | -7.65               | 19                |
| 4         |         | -9.56                 | -7.06               | 15                |

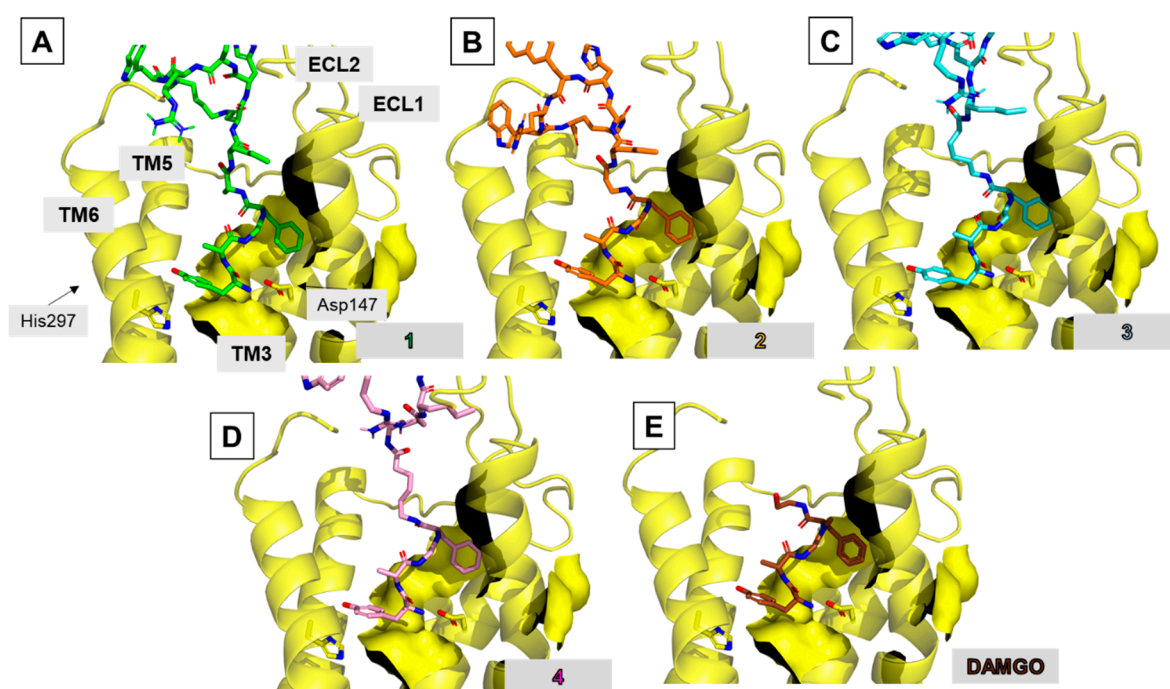

**Figure S11.** Binding poses of compounds 1-4 and DAMGO in the MOR binding site. Focus on the opioid fragment. The receptor (yellow) is shown in a simplified manner as helices (without TM1 and TM7), surface, and selected side chains shown as sticks. Ligands are shown as sticks. A) compound 1 (green), B) compound 2 (orange), C) compound 3 (aquamarine blue), D) compound 4 (pink), E) DAMGO (brown). For the sake of clarity only selected receptor elements and residues are labelled in part A. In the remaining parts, identical orientation is preserved.



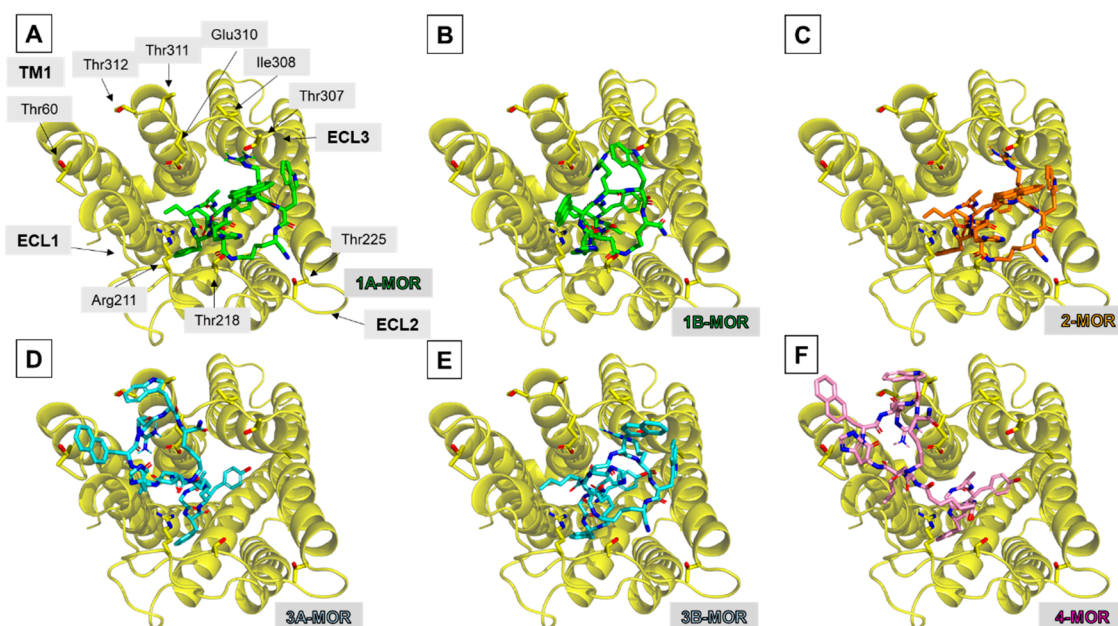

**Figure S12.** Binding poses of compounds **1-4** in the MOR binding site. Focus on the melanocortin-pharmacophoric fragment. The receptor (yellow) is shown in a simplified manner as helices and selected side chains shown as sticks. Ligands are shown as sticks. A) compound **1**, pose 1A-MOR (green), B) compound **1**, pose 1B-MOR (green), C) compound **2** (orange), D) compound **3**, pose 3A-MOR (aquamarine blue), E) compound **3**, pose 3B-MOR (aquamarine blue), F) compound **4** (pink). For the sake of clarity only selected receptor elements and residues are labelled in part A. In the remaining parts, identical orientation is preserved.

#### Contacts of the melanocortin-pharmacophoric fragment of compounds **1-4** with MOR

For compound **1**, docking finds two top-scored clusters of solutions (**1A-MOR** and **1B-MOR**). In both, the opioid part is positioned in virtually identical manner (Figure S11), as described in the main body of the manuscript. The melanocortin-pharmacophoric fragment is wedged between ECL2 and ECL3 of the receptor (Figure S12A and S12B). In **1A-MOR** pose (Figure S12A), the exocyclic amide's hydrogen H-bonds to Thr225<sup>ECL2</sup>. The side-chains Arg<sup>M8</sup> and Trp<sup>M9</sup> are involved in interactions to Ala304<sup>6,59</sup> carbonyl oxygen. The lactam bond in the peptide interacts with Thr218<sup>ECL2</sup> side-chain. In the **1B-MOR** pose (Figure S12B), Arg<sup>M8</sup> side chain locates closely to Ile308<sup>ECL3</sup> and Glu310<sup>ECL3</sup> side-chains, Trp<sup>M9</sup> is placed near Thr307<sup>ECL3</sup>, while His<sup>M6</sup> approaches Arg211<sup>ECL2</sup>.

For compound **2**, the MOR-bound pose (in the melanocortin-pharmacophoric fragment, Figure S12C) is stabilized by H-bond of the exocyclic amide's hydrogen to Thr225<sup>ECL2</sup> side chain. The lactam bond of the peptide is located close to Thr218<sup>ECL2</sup>. The side-chains of Arg<sup>M8</sup> and Trp<sup>M9</sup> are in contact with Ala304<sup>6,59</sup> (side-chain and carbonyl's oxygen). Additionally, Arg<sup>M8</sup> interacts with Thr307<sup>ECL3</sup> and Ile308<sup>ECL3</sup> (side-chain and carbonyl's oxygen).

In the case of compound **3** (Figures S12D and S12E), two energetically close solutions (**3A-MOR** and **3B-MOR**) are found, differing only with respect to the positioning of the melanocortin-pharmacophoric fragment. In **3A-MOR** pose (Figures S12D), this fragment locates close to ECL3 and the extracellular tip of TM1. In this mode, the D-Nal(2')<sup>M7</sup> side chain approaches Thr60<sup>N-term</sup>, while Arg<sup>M8</sup> side chain interacts with Glu310<sup>ECL3</sup> and Thr311<sup>7,28</sup>. In the **3B-MOR** pose (Figures S12E), the melanocortin-pharmacophoric fragment is wedged between ECL2 and ECL3. Among the intramolecular contacts, one finds interaction of Arg<sup>M8</sup> side-chain with the side-chains of Thr307<sup>ECL3</sup> and Glu310<sup>ECL3</sup>, as well as of Trp<sup>M9</sup> with Ala304<sup>6,59</sup>.

In the case of the longest analogue **4**, the melanocortin-pharmacophoric fragment is placed near the extracellular tip of TM1 and ECL3 (Figure S12F). His<sup>M6</sup> approaches Thr60<sup>N-term</sup>. The side-chain of Arg<sup>M8</sup> contacts to side-chains of Glu310<sup>ECL3</sup> and Thr312<sup>7,29</sup>, while the Trp<sup>M9</sup> interacts with Thr311<sup>7,28</sup>.

### Docking of compounds 1-4 to DOR.

**Table S4.** Energetics of the top scored clusters (at DOR).

|           | Lowest binding energy | Mean binding energy | Number in cluster |
|-----------|-----------------------|---------------------|-------------------|
| Compounds | [kcal/mol]            |                     |                   |
| 1         | -6.59                 | -6.03               | 11                |
| 2         | -6.51                 | -5.87               | 12                |
| 3         | -7.17                 | -5.85               | 16                |
| 4         | -5.47                 | -3.28               | 36                |

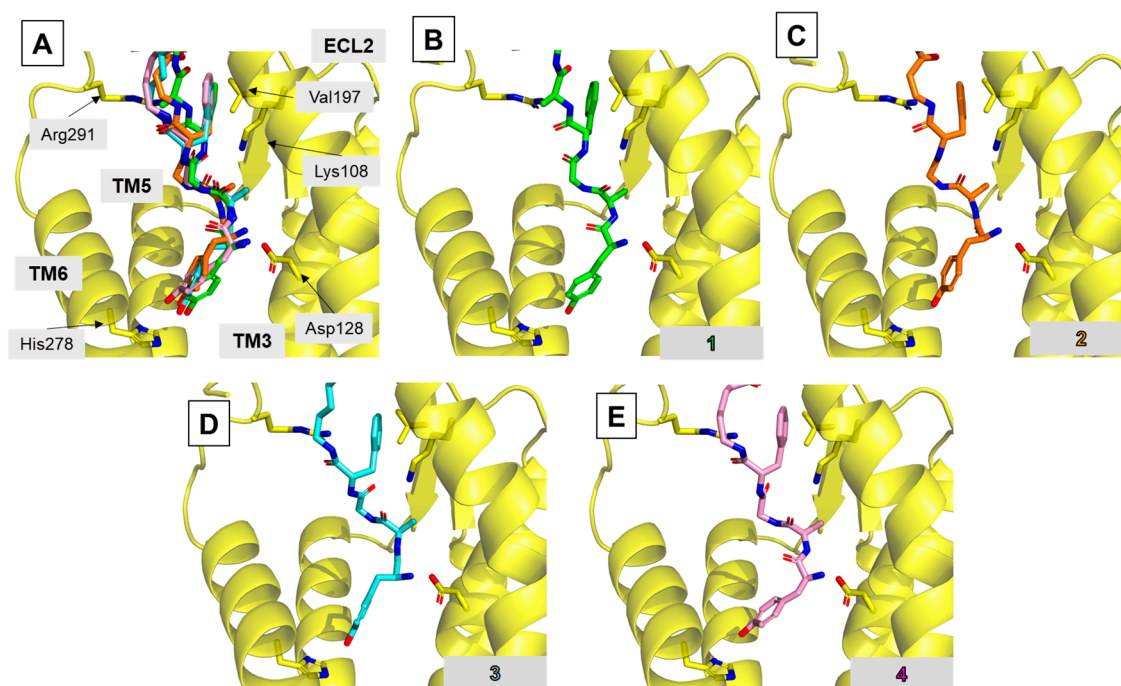

**Figure S13.** Binding poses of compounds 1-4 in the DOR binding site. Focus on the opioid fragment. The receptor (yellow) is shown in a simplified manner as helices (without TM1 and TM7), and selected side chains shown as sticks. Ligands are shown as sticks. A) Superposition of compounds 1-4, B) compound 1 (green), C) compound 2 (orange), D) compound 3 (aquamarine blue), E) compound 4 (pink). For the sake of clarity only selected receptor elements and residues are labelled in part A. In the remaining parts, identical orientation is preserved.

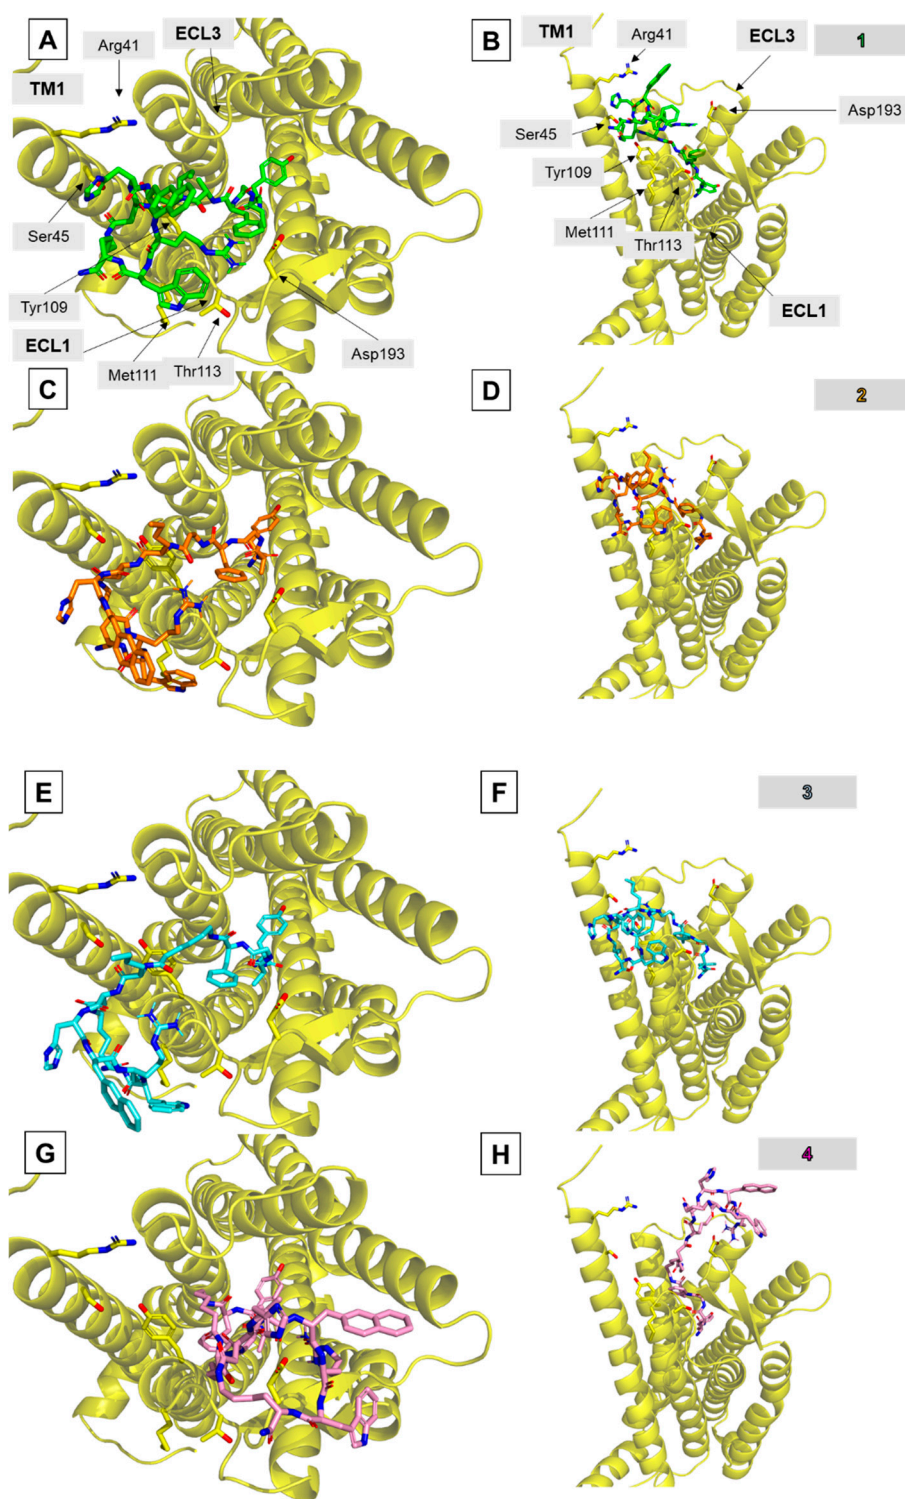

**Figure S14.** Binding poses of compounds **1-4** in the DOR binding site. Focus on the melanocortin-pharmacophoric fragment. The receptor (yellow) is shown in a simplified manner as helices and selected side chains shown as sticks. Ligands are shown as sticks. A-B) top and side view for compound **1** (green), C-D) top and side view for compound **2** (orange), E-F) top and side view for compound **3** (aquamarine blue), G-H) top and side view for compound **4** (pink). For the sake of clarity only selected receptor elements and residues are labelled in parts A and B. In the remaining parts, identical orientation is preserved.

## Docking of compounds 1-4 to MC4R.

**Table S5.** Energetics of the top scored clusters (at MC4R).

|           |         | Lowest binding energy | Mean binding energy | Number in cluster |
|-----------|---------|-----------------------|---------------------|-------------------|
| Compounds | Cluster | [kcal/mol]            |                     |                   |
| 1         |         | -20.32                | -19.03              | 115               |
| 2         |         | -19.26                | -18.19              | 15                |
| 3         | A       | -19.62                | -17.00              | 7                 |
|           | B       | -19.08                | -17.27              | 13                |
|           | C       | -19.04                | -17.84              | 8                 |
| 4         |         | -19.76                | -18.43              | 9                 |

## Listing of interactions of the opioid-linker fragment found in complexes of 3 with MC4R (three poses):

### 3A-MC4R

Tyr<sup>O1</sup> NH<sub>3</sub><sup>+</sup> ... Asp189<sup>ECL2</sup> side chain (H-bond/ionic)

Nle<sup>M4</sup> NH (amide) ... Asp111<sup>ECL1</sup> side chain (H-bond)

### 3B-MC4R

Tyr<sup>O1</sup> NH<sub>3</sub><sup>+</sup> ... Thr112<sup>ECL1</sup> side chain (H-bond)

Phe<sup>O4</sup> (aromatic ring) ... Thr112<sup>ECL1</sup> side chain (hydrophobic)

Nle<sup>M4</sup> NH (amide) ... Asp111<sup>ECL1</sup> side chain (H-bond)

### 3C-MC4R

Gly<sup>O3</sup> NH (amide) ... Ile186<sup>4.62</sup> carbonyl oxygen (H-bond)

Phe<sup>O4</sup> NH (amide) ... Ile185<sup>4.61</sup> carbonyl oxygen (H-bond)

Phe<sup>O4</sup> (aromatic ring) ... Ile186<sup>4.62</sup> side chain (hydrophobic)

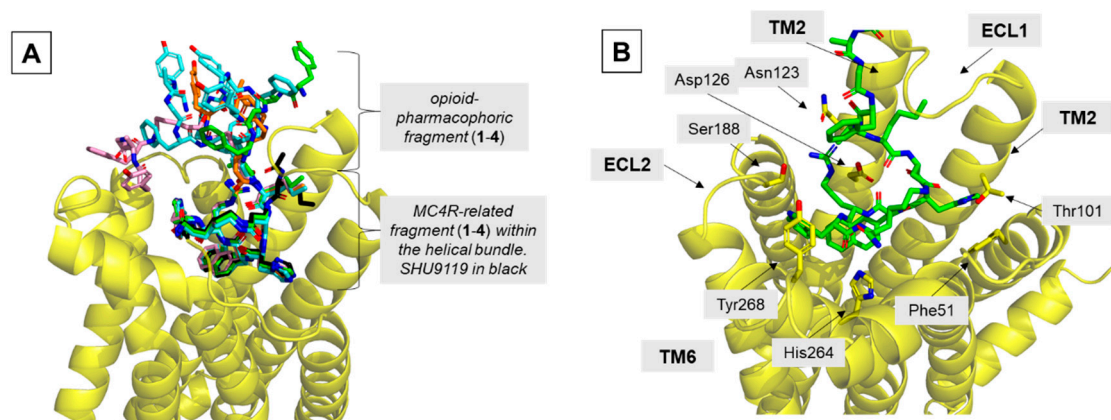

**Figure S15.** Binding poses of compounds 1-4 and of SHU9119 at the MC4R receptor. A) A general view, B) focus (rotated) on the interactions of the melanocortin-pharmacophoric fragment, compound 1 (green). Ligands are shown as sticks. SHU9119 is represented in black. The receptor (yellow) is shown in a simplified manner as helices and some side chains shown as sticks. Only selected residues of the receptor are labelled.



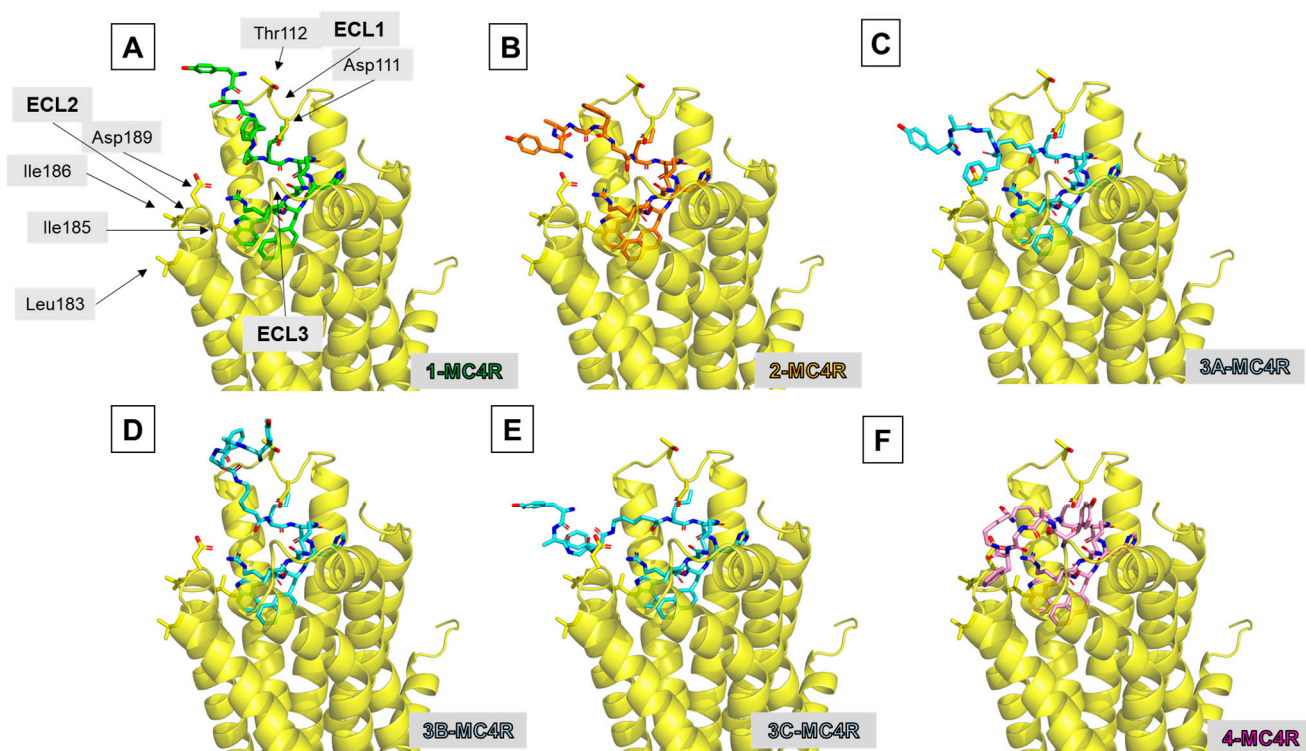

**Figure S16.** Binding poses of compounds **1-4** at the MC4R receptor (side-view). Focus on the positioning of the opioid-linker fragment. Ligands are shown as sticks. The receptor (yellow) is shown in a simplified manner as helices and some side chains shown as sticks. A) Compound **1** (green), B) compound **2** (orange), C) compound **3**, pose 3A-MC4R (aquamarine blue), D) compound **3**, pose 3B-MC4R (aquamarine blue), E) compound **3**, pose 3C-MC4R (aquamarine blue), F) compound **4** (pink). For the sake of clarity only selected receptor elements and residues are labelled in part. In the remaining parts, identical orientation is preserved.
